# Supplementary material for: Three-dimensional flower-like Ni–S/Co-MOF grown on Ni foam as a bifunctional electrocatalyst for efficient overall water splitting
Source: Royal Society of Chemistry journal article supplement (doi:10.1039/d3cp05992h), 2024-01-01
Supplement: d3cp05992h1.pdf [file d3cp05992h1.pdf]

# **Three-dimensional flower-like Ni-S/Co-MOF grown on Ni foam as bifunctional electrocatalyst for efficient overall water splitting**

Chang Su<sup>a</sup>, Dan Wang<sup>b</sup>, Wenchang Wang<sup>b,c</sup>, Naotoshi Mitsuzaki<sup>d</sup>, Rong Shao<sup>e</sup>, Qi Xu<sup>e</sup>, Zhidong Chen<sup>\*a,b</sup>

<sup>a</sup> School of Materials Science and Engineering, Changzhou University, Changzhou, 213164, Jiangsu, China.

<sup>a</sup> School of Materials Science and Engineering, Changzhou University, Changzhou, 213164, Jiangsu, China.

<sup>b</sup> Jiangsu Key Laboratory of Advanced Catalytic Materials and Technology, Advanced Catalysis and Green Manufacturing Collaborative Innovation Center, School of Petrochemical Engineering, Changzhou University, Changzhou 213164, P.R China.

<sup>c</sup> Analysis and Testing Center, NERC Biomass of Changzhou University, Changzhou, Jiangsu, 213032, China.

<sup>d</sup> Qualtec Co., Ltd, Osaka, 590-0906, Japan

<sup>e</sup> Yancheng Institute Of Technology, Yanchen ,224007, China.

Corresponding author E-mail : \*Z. Chen: [zdchen@cczu.edu.cn](mailto:zdchen@cczu.edu.cn),

## **Materials and Reagents**

The cobalt nitrate hexahydrate ( $\text{Co}(\text{NO}_3)_2 \cdot 6\text{H}_2\text{O}$ ), nickel nitrate hexahydrate ( $\text{Ni}(\text{NO}_3)_2 \cdot 6\text{H}_2\text{O}$ ) and sodium carbonate ( $\text{NaNO}_3$ ) were obtained from Sinopharm Chemical Reagent Co. Ltd. The 2-aminoterephthalic acid (2-NH<sub>2</sub>-BDC) and thiourea ( $\text{H}_2\text{NCSNH}_2$ ) were purchased from Sigma-Aldrich Co. Ltd. The potassium hydroxide (KOH) and N,N dimethylformamide (DMF) were purchased from Shanghai Maclean Biochemical Technology Co., Ltd. Besides, ultrapure water (18.2 M $\Omega$ ) was utilized throughout the whole experiment. The purity of all reagents more than 99%.

## **Materials characterization**

The morphologies and microstructures of the prepared products were tested by scanning electron microscope (SEM, JSM-6360LA, Japan) and transmission electron microscopy (TEM, JEM-2010, Japan). The X-ray diffraction (XRD) was used to identify the crystal phases of products on the Max-2000 (Rigaku Co., Ltd., Japan) and X-ray photoelectron spectroscopy (XPS) can be used to analyze the elemental chemical states of the catalyst materials on the AXIS-Ultra DLD (Shimazu, Japan).

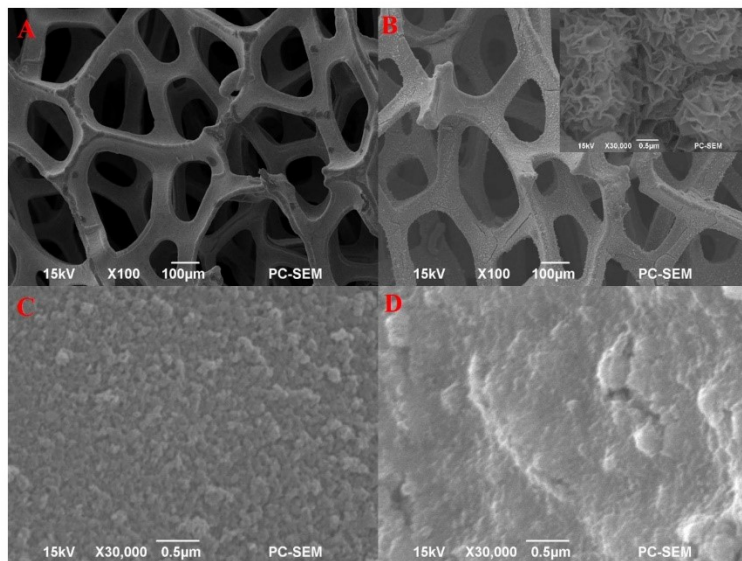

**Fig. S1.** The SEM images of the bare NF (A) and the Ni-S/Co-MOF/NF (B), Ni/NF (C), Ni-S/NF (D).

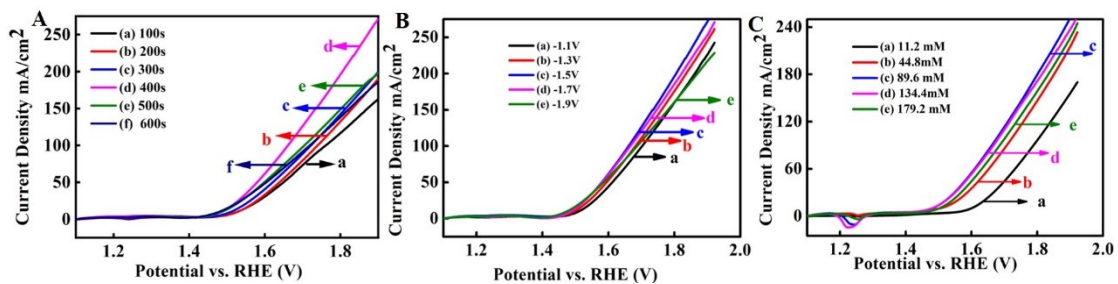

**Fig. S2.** Polarization curves of Co-MOF/NF with various deposition time (A), applied potential (B) and the concentration of Co<sup>2+</sup> in 1 M KOH.

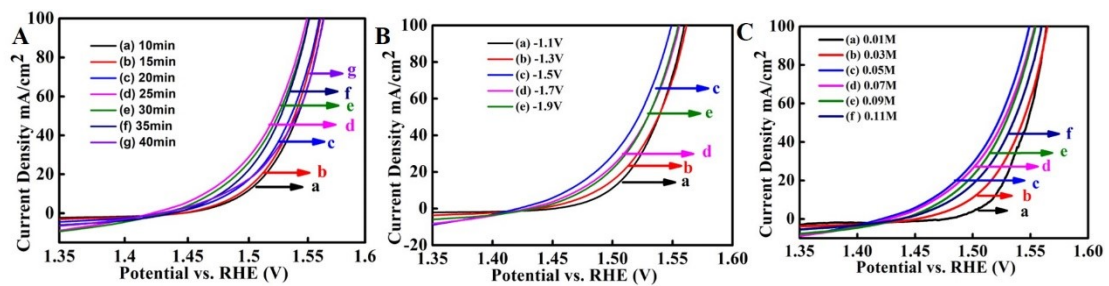

**Fig. S3.** Polarization curves of Ni-S/Co-MOF/NF with various deposition time (A), applied potential (B) and the concentration of  $\text{Ni}^{2+}$  in 1 M KOH.

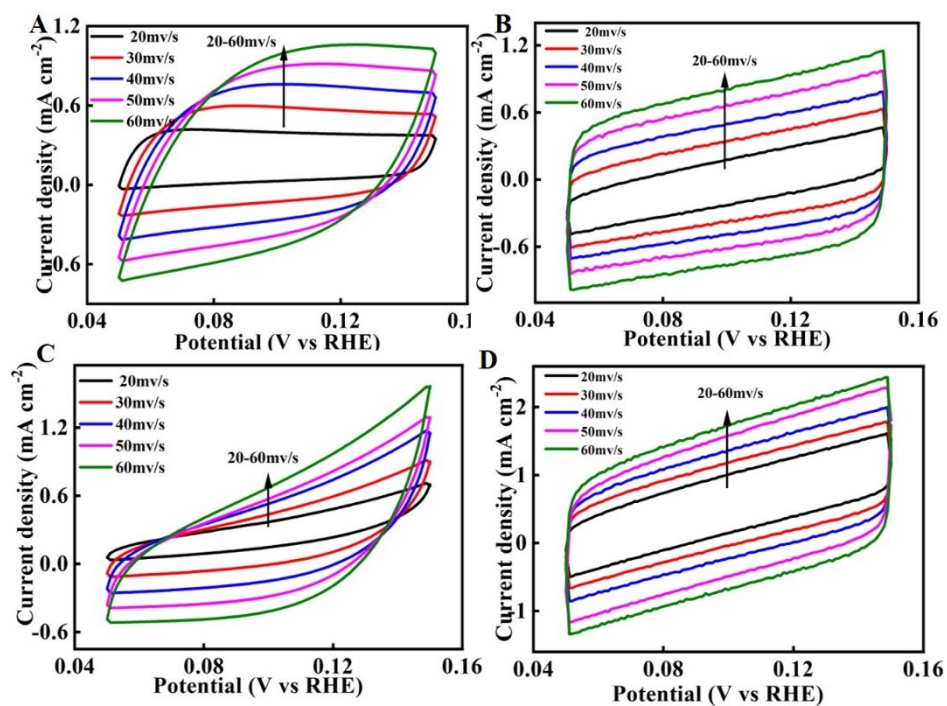

**Fig. S4.** CV curves of various electrodes in the potential window from 0.05 to 0.15 V (vs. RHE) at 20, 30, 40, 50, and 60 mV s<sup>-1</sup>: (A) Co-MOF/NF, (B) Ni/NF, (C) Ni-S/NF and (D) Ni-S/Co-MOF/NF.

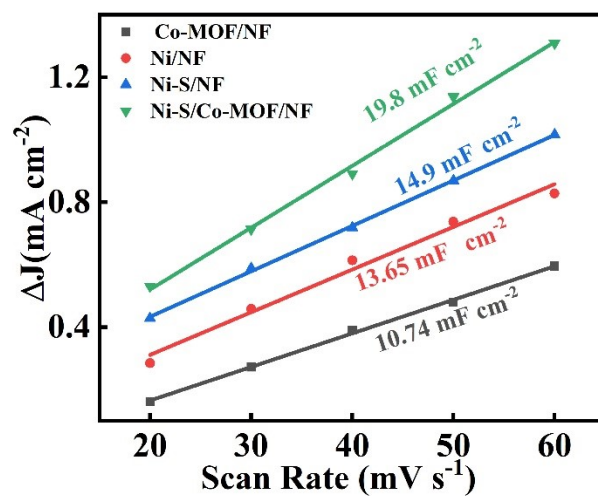

Fig. S5. Double-layer capacitances ( $C_{dl}$ ) of the four samples derived from the cyclic voltammograms.

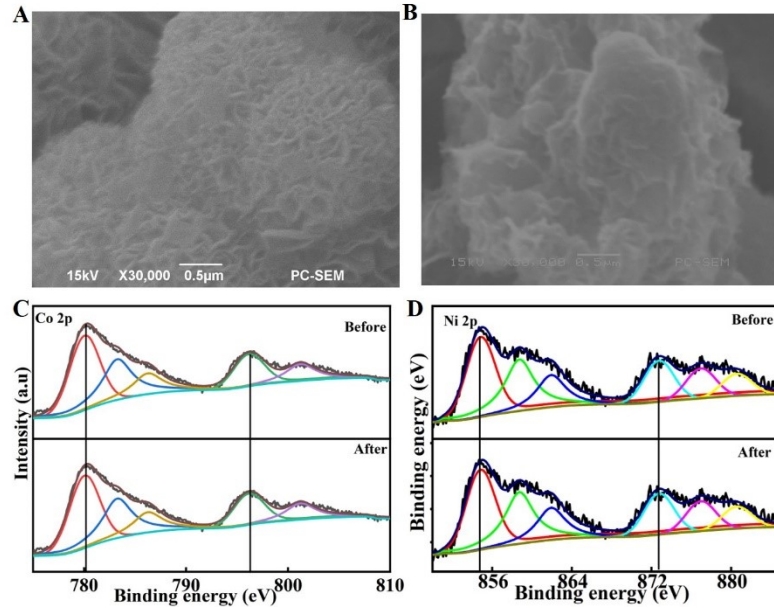

**Fig. S6.** (A, B) SEM images of Ni-S/Co-MOF/NF before and after 16 h of stability test at a constant current density for HER and OER, respectively. (C,D) High resolution XPS spectra of Ni-S/Co-MOF/NF after stability test for HER.



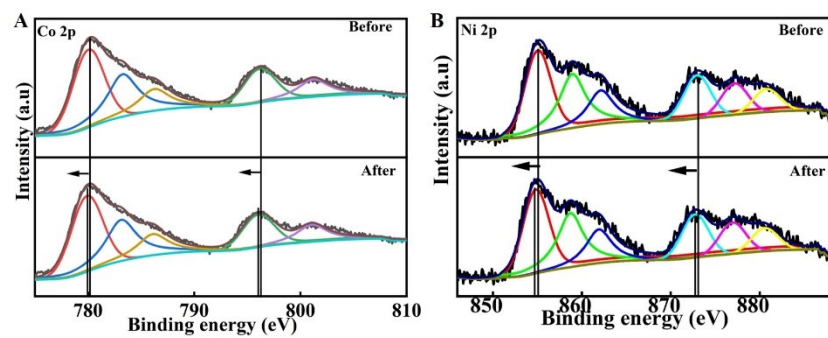

**Fig. S7.** High resolution XPS spectra of Ni-S/Co-MOF/NF after stability test for OER.

**Table S1.** Comparison of OER activity at 10 mA cm<sup>-2</sup> and stability of various Co-based MOFs catalysts.

| Catalyst                                                                     | $\eta_{10}/\text{mV}$ | Tafel slope/<br>mV dec <sup>-1</sup> | Electrolyte   | Reference        |
|------------------------------------------------------------------------------|-----------------------|--------------------------------------|---------------|------------------|
| <b>Ni-S/Co-MOF/NF</b>                                                        | <b>248</b>            | <b>29.1</b>                          | <b>1M KOH</b> | <b>This work</b> |
| CoFe-MOF                                                                     | 265                   | 44                                   | 1M KOH        | 1                |
| NiCo-MOF@Fe-MOF                                                              | 275                   | 54                                   | 1M KOH        | 2                |
| CoPS@NPS-C                                                                   | 320                   | 45                                   | 1M KOH        | 3                |
| Hollow CoS <sub>2</sub> -MoS <sub>2</sub>                                    | 266                   | 104                                  | 1M KOH        | 4                |
| Ni-S/MIL-53(Fe)                                                              | 256                   | 39                                   | 1M KOH        | 5                |
| Fe-Co-Ni MOF                                                                 | 254                   | 51.3                                 | 1M KOH        | 6                |
| (Ni <sub>2</sub> Co <sub>1</sub> ) <sub>0.925</sub> Fe <sub>0.075</sub> -MOF | 257                   | 41.3                                 | 1M KOH        | 7                |
| Co-BPDC/Co-BDC-3                                                             | 335                   | 72.1                                 | 1M KOH        | 8                |
| Co-Ni@HPA-MOF                                                                | 320                   | 58                                   | 1M KOH        | 9                |
| CoWO <sub>4</sub> -Co(OH) <sub>2</sub>                                       | 280                   | 70.6                                 | 1M KOH        | 10               |

**Table S2.** Comparison of HER activity at 10 mA cm<sup>-2</sup> and stability of various Co-based MOFs catalysts.

| Catalyst                                     | $\eta_{10}/\text{mV}$ | Tafel slope/<br>mV dec <sup>-1</sup> | Electrolyte   | Reference        |
|----------------------------------------------|-----------------------|--------------------------------------|---------------|------------------|
| <b>Ni-S/Co-MOF/NF</b>                        | <b>127</b>            | <b>32.25</b>                         | <b>1M KOH</b> | <b>This work</b> |
| CoPS@NPS-C                                   | 320                   | 45                                   | 1M KOH        | 3                |
| CoNC@MoS <sub>2</sub> /CNFs                  | 143                   | 68                                   | 1M KOH        | 11               |
| BP/MOF-Fe/Co                                 | 180                   | 67                                   | 1M KOH        | 12               |
| CoCoO/ZnFe <sub>2</sub> O <sub>4</sub> @CNWs | 226                   | 138                                  | 1M KOH        | 13               |
| NiCo-MOF-P                                   | 195                   | 105                                  | 1M KOH        | 14               |
| Ni-Co-Se/CFP                                 | 162                   | 54                                   | 1M KOH        | 15               |

**Table S3.** Comparison of overall water splitting at 10 mA cm<sup>-2</sup> and stability of various Co-based MOFs catalysts.

| <b>Catalyst</b>            | <b>Volatage/<br/>V</b> | <b>Electrolyte</b> | <b>Reference</b> |
|----------------------------|------------------------|--------------------|------------------|
| <b>Ni-S/Co-MOF/NF</b>      | <b>1.59</b>            | <b>1M KOH</b>      | <b>This work</b> |
| BP/MOF-Fe/Co               | 1.63                   | 1M KOH             | 3                |
| Fe-Co-Ni-MOF               | 1.60                   | 1M KOH             | 6                |
| CoNC@MoS <sub>2</sub> /CNF | 1.62                   | 1M KOH             | 11               |
| CoNiP/NF                   | 1.62                   | 1M KOH             | 16               |
| FeCoMnNi-MOF-74/NF         | 1.62                   | 1M KOH             | 17               |
| Co,Fe-MOF-74/Co/CC         | 1.65                   | 1M KOH             | 18               |

## Notes and references

1. Z. Zou, T. Wang, X. Zhao, W.-J. Jiang, H. Pan, D. Gao and C. Xu, *ACS Catalysis*, 2019, **9**, 7356-7364.
2. K. Rui, G. Zhao, Y. Chen, Y. Lin, Q. Zhou, J. Chen, J. Zhu, W. Sun, W. Huang and S. X. Dou, *Advanced Functional Materials*, 2018, **28**.
3. Y. Hu, F. Li, Y. Long, H. Yang, L. Gao, X. Long, H. Hu, N. Xu, J. Jin and J. Ma, *Journal of Materials Chemistry A*, 2018, **6**, 10433-10440.
4. Y. Li, W. Wang, B. Huang, Z. Mao, R. Wang, B. He, Y. Gong and H. Wang, *Journal of Energy Chemistry*, 2021, **57**, 99-108.
5. F. Wu, X. Guo, G. Hao, Y. Hu and W. Jiang, *Nanoscale*, 2019, **11**, 14785-14792.
6. F. Shahbazi Farahani, M. S. Rahmanifar, A. Noori, M. F. El-Kady, N. Hassani, M. Neek-Amal, R. B. Kaner and M. F. Mousavi, *Journal of the American Chemical Society*, 2022, **144**, 3411-3428.
7. Q. Qian, Y. Li, Y. Liu, L. Yu and G. Zhang, *Adv Mater*, 2019, **31**, e1901139.
8. Q. Zha, F. Yuan, G. Qin and Y. Ni, *Inorg Chem*, 2020, **59**, 1295-1305.
9. M. Lu, Y. Li, P. He, J. Cong, D. Chen, J. Wang, Y. Wu, H. Xu, J. Gao and J. Yao, *Journal of Solid State Chemistry*, 2019, **272**, 32-37.
10. H. Xu, C. Wang, G. He, H. Chen and Y. Du, *Inorg Chem*, 2022, **61**, 14224-14232.
11. D. Ji, S. Peng, L. Fan, L. Li, X. Qin and S. Ramakrishna, *Journal of Materials Chemistry A*, 2017, **5**, 23898-23908.
12. K. Ge, Y. Zhang, Y. Zhao, Z. Zhang, S. Wang, J. Cao, Y. Yang, S. Sun, M. Pan and L. Zhu, *ACS Appl Mater Interfaces*, 2022, **14**, 31502-31509.
13. W. Liu, Y. Zhou, J. Bao, J. Wang, Y. Zhang, X. Sheng, Y. Xue, C. Guo and X. Chen, *J Colloid Interface Sci*, 2020, **561**, 620-628.
14. M. M. Rajpure, H. A. Bandal, H. S. Jadhav and H. Kim, *Journal of Electroanalytical Chemistry*, 2022, **923**, 116825.
15. K. Ao, J. Dong, C. Fan, D. Wang, Y. Cai, D. Li, F. Huang and Q. Wei, *ACS Sustainable Chemistry & Engineering*, 2018, **6**, 10952-10959.
16. H. Liu, R. Huang, W. Chen, Y. Zhang, M. Wang, Y. Hu, Y. Zhou and Y. Song, *Applied Surface Science*, 2021, **569**.
17. M. Zhang, W. Xu, T. Li, H. Zhu and Y. Zheng, *Inorganic Chemistry*, 2020, **59**, 15467-15477.
18. Q. Zha, M. Li, Z. Liu and Y. Ni, *ACS Sustainable Chemistry & Engineering*, 2020, **8**, 12025-12035.
